# Supplementary material for: Bioavailable Citrus sinensis Extract: Polyphenolic Composition and Biological Activity
Source: PubMed Central journal article supplement (PMC6154582; doi:10.3390/molecules22040623), 2017-04-15

Table S1

| Peak | $k'$  | [M-H] <sup>-</sup> | [M-H] <sup>+</sup> | MS <sup>2</sup> $m/z$ | Error (ppm) | Regression Curve                   | R <sup>2</sup> | LOD (ppm) | LOQ (ppm) | Extract flavonoids * | <i>In vitro</i> gastrointestinal digestion |               |              |              | Compound                               |
|------|-------|--------------------|--------------------|-----------------------|-------------|------------------------------------|----------------|-----------|-----------|----------------------|--------------------------------------------|---------------|--------------|--------------|----------------------------------------|
|      |       |                    |                    |                       |             |                                    |                |           |           |                      | Salivary *                                 | Gastric *     | Intestinal * | Dialysis *   |                                        |
| 1    | 2.64  | 593.1518           | –                  | 353.0691              | 1.18        | $y = 1.2604E^{06}x - 1.0047E^{03}$ | 0.9981         | 0.8921    | 1.5622    | 49.11 ± 2.87         | 36.86 ± 0.42                               | 34.38 ± 0.20  | 8.01 ± 0.13  | 2.53 ± 0.01  | vicenin-2                              |
| 2    | 3.03  | 623.1628           | –                  | 383.0791              | 1.60        | $y = 1.2604E^{06}x - 1.0047E^{03}$ | 0.9981         | 0.8921    | 1.5622    | 32.77 ± 0.47         | 26.24 ± 0.80                               | 24.58 ± 0.29  | 4.65 ± 0.12  | 1.71 ± 0.02  | lucenin-2 4'-methyl ether              |
| 3    | 4.56  | 609.1478           | –                  | 301.0382              | 2.79        | $y = 1.0012E^{06}x - 2.2930E^{03}$ | 0.9953         | 0.6987    | 1.2235    | 9.75 ± 2.97          | 8.31 ± 0.88                                | 7.81 ± 0.04   | 1.98 ± 0.10  | 0.95 ± 0.08  | neohesperidin                          |
| 4    | 6.24  | 595.1692           | –                  | 288.9530              | 4.03        | $y = 1.2657E^{06}x - 2.3642E^{04}$ | 0.9962         | 0.8976    | 1.5718    | 5.86 ± 0.11          | 5.27 ± 0.07                                | 4.98 ± 0.12   | 1.31 ± 0.12  | 0.57 ± 0.02  | eriocitrin                             |
| 5    | 6.72  | 463.0890           | –                  | 301.0353              | 1.73        | $y = 8.9337E^{07}x - 1.7211E^{03}$ | 0.9983         | 0.6322    | 1.1071    | 4.06 ± 0.94          | 4.02 ± 0.45                                | 3.57 ± 0.08   | 0.76 ± 0.09  | 0.36 ± 0.01  | isoquercitrin                          |
| 6    | 7.44  | 579.1835           | –                  | 271.0636              | 1.35        | $y = 1.0043E^{06}x - 3.2128E^{04}$ | 0.9996         | 0.7098    | 1.2429    | 55.14 ± 1.97         | 43.01 ± 0.93                               | 40.25 ± 0.55  | 13.34 ± 1.62 | 2.93 ± 0.09  | narirutin                              |
| 7    | 8.49  | 607.1317           | –                  | 300.0320              | 1.98        | $y = 4.7437E^{07}x + 1.5354E^{04}$ | 0.9996         | 0.7458    | 1.3060    | 2.72 ± 0.62          | 2.26 ± 0.24                                | 2.15 ± 0.05   | 0.55 ± 0.02  | 0.26 ± 0.03  | neodiosmin                             |
| 8    | 9.38  | 609.1738           | –                  | 301.0736              | 3.28        | $y = 6.4061E^{07}x - 1.9685E^{03}$ | 0.9966         | 0.4657    | 0.8155    | 207.65 ± 1.77        | 184.81 ± 2.76                              | 176.51 ± 1.05 | 30.94 ± 3.49 | 10.73 ± 0.07 | hesperidin                             |
| 9    | 13.73 | 593.1895           | –                  | 285.0763              | 3.20        | $y = 6.4061E^{07}x - 1.9685E^{03}$ | 0.9966         | 0.4657    | 0.8155    | 3.55 ± 0.15          | 3.37 ± 0.07                                | 3.12 ± 0.20   | 0.71 ± 0.13  | 0.31 ± 0.03  | didymin                                |
| 10   | 16.55 | –                  | 373.1236           | 343.0805              | 3.48        | $y = 4.2086E^{07}x + 9.9601E^{04}$ | 0.9975         | 0.0540    | 0.1018    | 3.62 ± 1.25          | 2.79 ± 0.21                                | 2.64 ± 0.03   | 1.81 ± 0.13  | 1.64 ± 0.02  | isosinensetin                          |
| 11   | 16.73 | –                  | 403.1371           | 373.0918              | -3.97       | $y = 4.2086E^{07}x + 9.9601E^{04}$ | 0.9975         | 0.0540    | 0.1018    | 2.35 ± 0.97          | 0.96 ± 0.09                                | –             | –            | –            | hexamethoxyflavone                     |
| 12   | 16.88 | –                  | 373.1268           | 312.0990              | 3.49        | $y = 4.2086E^{07}x + 9.9601E^{04}$ | 0.9975         | 0.1343    | 0.2644    | 7.64 ± 0.99          | 6.42 ± 0.60                                | 6.03 ± 0.28   | 3.96 ± 0.23  | 3.57 ± 0.04  | sinensetin                             |
| 13   | 17.00 | –                  | 403.1362           | 373.0923              | -0.25       | $y = 4.2086E^{07}x + 9.9601E^{04}$ | 0.9975         | 0.1343    | 0.2644    | 2.66 ± 0.78          | –                                          | –             | –            | –            | hexamethoxyflavone <i>isomer</i>       |
| 14   | 17.09 | –                  | 403.1331           | 373.0936              | 0.50        | $y = 4.2086E^{07}x + 9.9601E^{04}$ | 0.9975         | 0.2981    | 0.5220    | 21.22 ± 1.15         | 21.04 ± 0.31                               | 20.12 ± 0.71  | 11.51 ± 0.72 | 9.42 ± 0.05  | nobiletin                              |
| 15   | 17.23 | –                  | 343.1166           | 282.0876              | -2.91       | $y = 4.2086E^{07}x + 9.9601E^{04}$ | 0.9975         | 0.2981    | 0.5220    | 2.82 ± 1.37          | 2.40 ± 0.10                                | 1.98 ± 0.03   | –            | –            | tetramethyl- <i>o</i> -isoscutelearein |
| 16   | 17.35 | –                  | 433.1472           | 403.1019              | -4.85       | $y = 4.2086E^{07}x + 9.9601E^{04}$ | 0.9975         | 0.0445    | 0.0799    | 4.06 ± 1.49          | 3.75 ± 0.54                                | 2.24 ± 0.06   | 0.85 ± 0.04  | –            | heptamethoxyflavone                    |
| 17   | 17.46 | –                  | 373.1238           | 343.0809              | 4.02        | $y = 4.2086E^{07}x + 9.9601E^{04}$ | 0.9975         | 0.0445    | 0.0799    | 5.54 ± 0.79          | 4.26 ± 0.66                                | 2.93 ± 0.01   | 0.74 ± 0.04  | –            | tangeretin                             |
| 18   | 17.97 | –                  | 389.1215           | 359.0741              | 2.06        | $y = 4.2086E^{07}x + 9.9601E^{04}$ | 0.9975         | 0.0618    | 0.1091    | –                    | –                                          | –             | –            | –            | hydroxypentamethoxyflavone             |
| 19   | 18.32 | –                  | 419.1318           | 389.0866              | -4.53       | $y = 4.2086E^{07}x + 9.9601E^{04}$ | 0.9975         | 0.0618    | 0.1091    | –                    | –                                          | –             | –            | –            | 3-hydroxynobiletin                     |

\*: The amount of the compounds was expressed as milligram per gram of extract. Data are reported as mean ± relative standard deviation (RSD %) values of at least three independent experiments.

LOD: limit of detection

LOQ: limit of quantitation

R<sup>2</sup>: linear correlation coefficient

$k'$ : capacity factor ( $\frac{T_r - T_0}{T_0}$ );  $T_r$ : retention time;  $T_0$ : dead time.

Figure S1

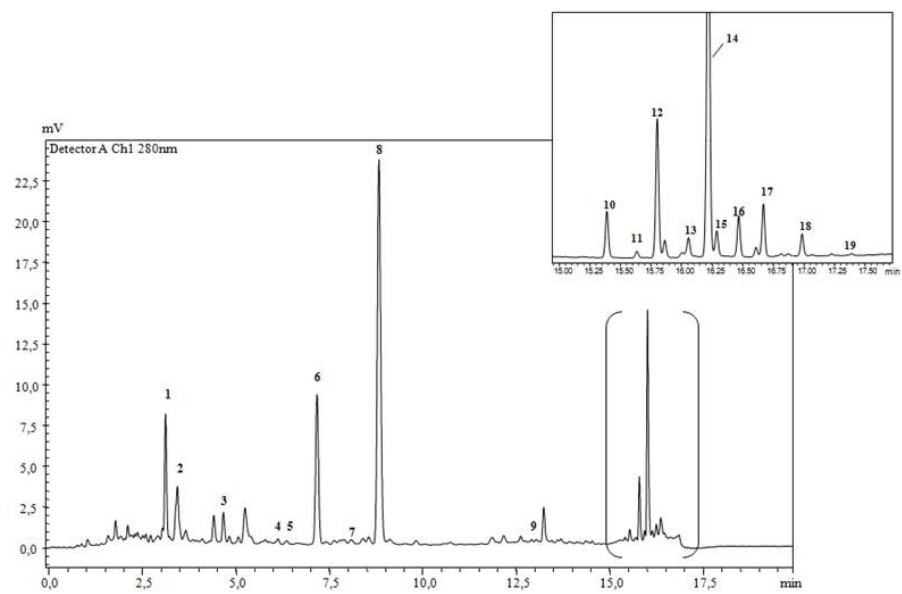

Supplement: molecules-22-00623-s001.pdf [file molecules-22-00623-s001.pdf]
